# Supplementary material for: The fate of nanoparticle surface chemistry during reductive electrosynthesis in aprotic media
Source: Royal Society of Chemistry journal article supplement (doi:10.1039/d4nr04135f), 2025-01-01
Supplement: d4nr04135f1.pdf [file d4nr04135f1.pdf]

# Supporting Information

## The fate of nanoparticle surface chemistry during reductive electrosynthesis in aprotic media

Xenia V. Medvedeva<sup>a</sup>, Jury J. Medvedev<sup>a</sup>, Xingya Zhao<sup>a</sup>, Elena Smith<sup>a</sup>, and A. Klinkova<sup>a\*</sup>

---

<sup>a</sup>Department of Chemistry and Waterloo Institute for Nanotechnology University of Waterloo, Waterloo, Ontario N2L 3G1, Canada.

\*Correspondence: [aklinkova@uwaterloo.ca](mailto:aklinkova@uwaterloo.ca)

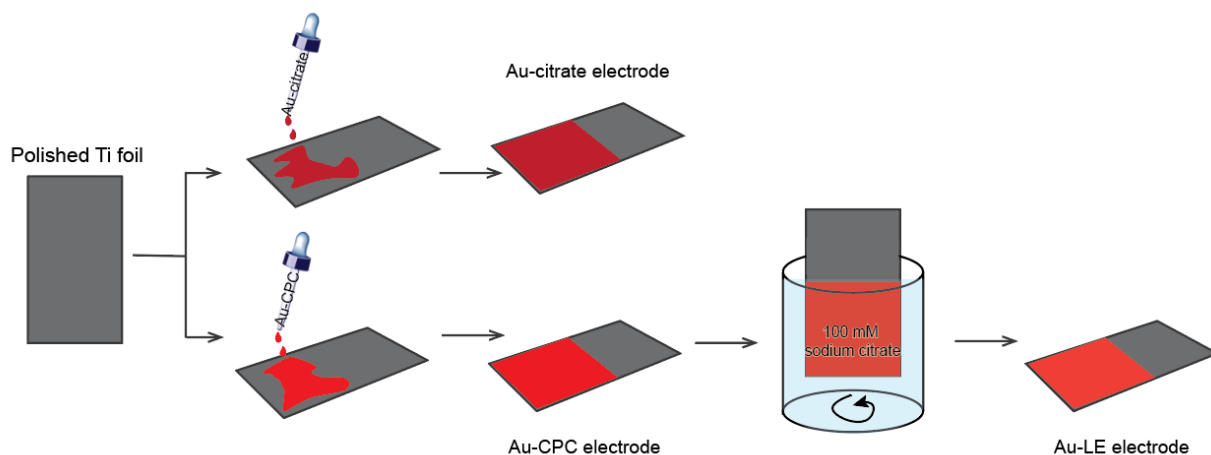

**Fig. S1:** Au electrode preparation and ligand exchange schematic.

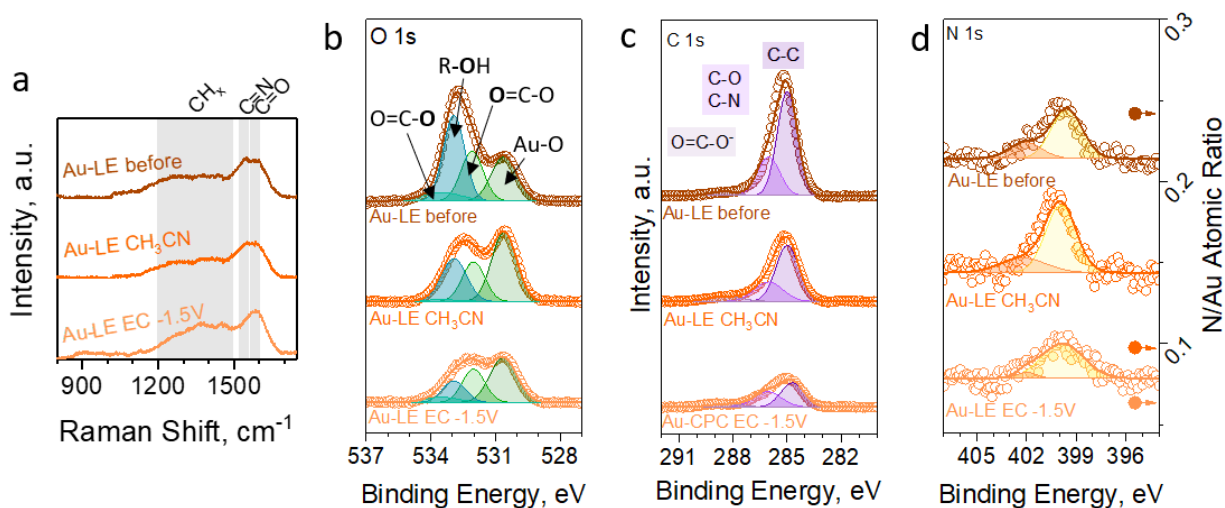

**Fig. S2:** Assessment of the Au-LE surface chemistry. Raman spectra (a) and XPS for O 1s (b), C 1s (c), and N 1s (d). Brown traces correspond to as prepared Au-LE, bright orange traces correspond to Au-LE extensively washed with acetonitrile, and light orange traces correspond to the Au-LE surface after EC for 1 h at -1.5 V vs Ag/Ag<sup>+</sup>.

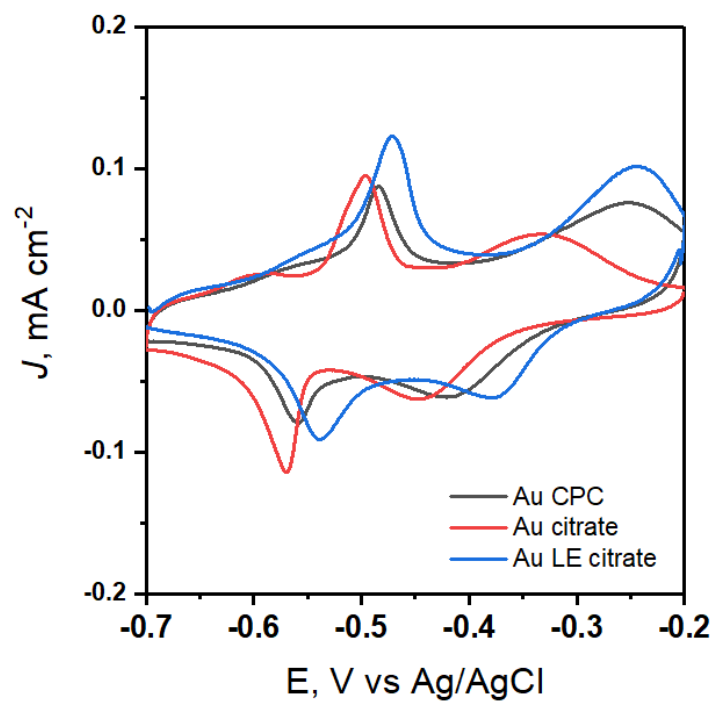

|                                                   | Au CPC      | Au LE citrate | Au citrate  |
|---------------------------------------------------|-------------|---------------|-------------|
| <b>Q, <math>\mu\text{C}</math></b>                | <b>1360</b> | <b>1320</b>   | <b>847</b>  |
| <b>ECSA<sup>a</sup>, <math>\text{cm}^2</math></b> | <b>4.95</b> | <b>4.81</b>   | <b>3.09</b> |

<sup>a</sup>ECSA was calculated using an arbitrary charge of  $274 \mu\text{C cm}^{-2}$

**Fig. S3:**  $\text{Pb}_{\text{UPD}}$  of Au nanoparticle electrodes with a loading of  $1 \text{ mg cm}^{-2}$  and the corresponding electrochemically active surface area (ECSA). Au-CPC (black trace), Au-citrate (red trace), and Au-LE (blue trace). CV was recorded in  $0.1 \text{ M NaOH}$  with the addition of  $1 \text{ mM Pb(NO}_3)_2$  at a scan rate of  $20 \text{ mV s}^{-1}$ .

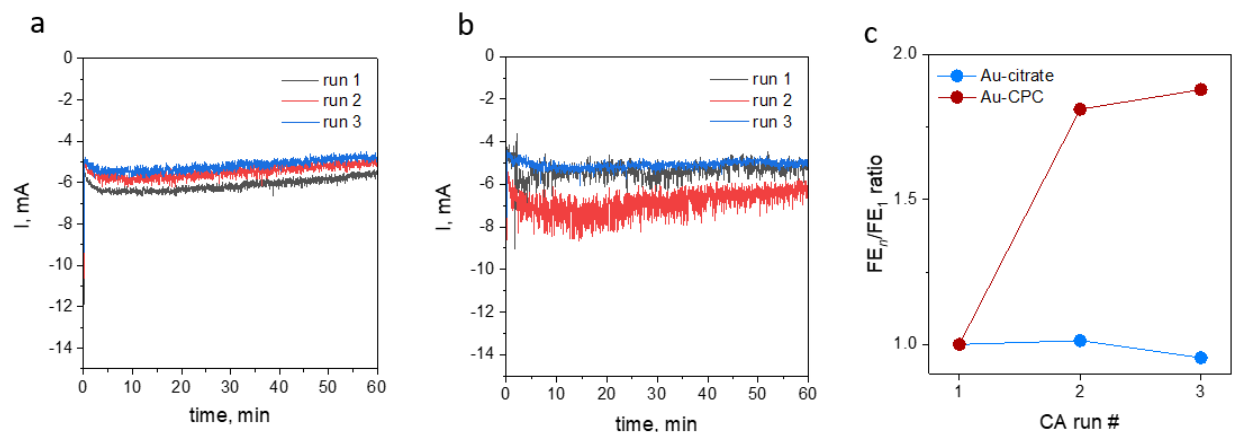

**Fig. S4:** Electrode stability in EC during short term electrolysis. (a,b) Consecutive 1h CAs under typical EC conditions at -1.5 V vs Ag/Ag<sup>+</sup> for Au-CPC electrode (a) and Au-citrate electrode(b). (c) Carboxylate FE change upon the electrode repeated use.

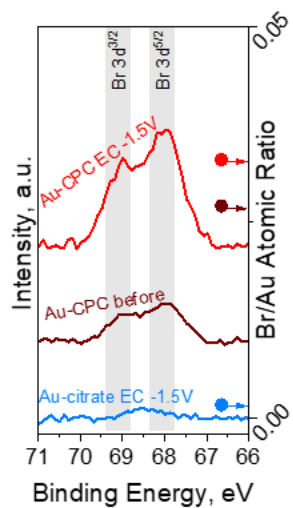

**Fig. S5:** XPS evaluation of adsorbed Br based on the Br 3d peak for Au-CPC and Au-citrate electrodes.

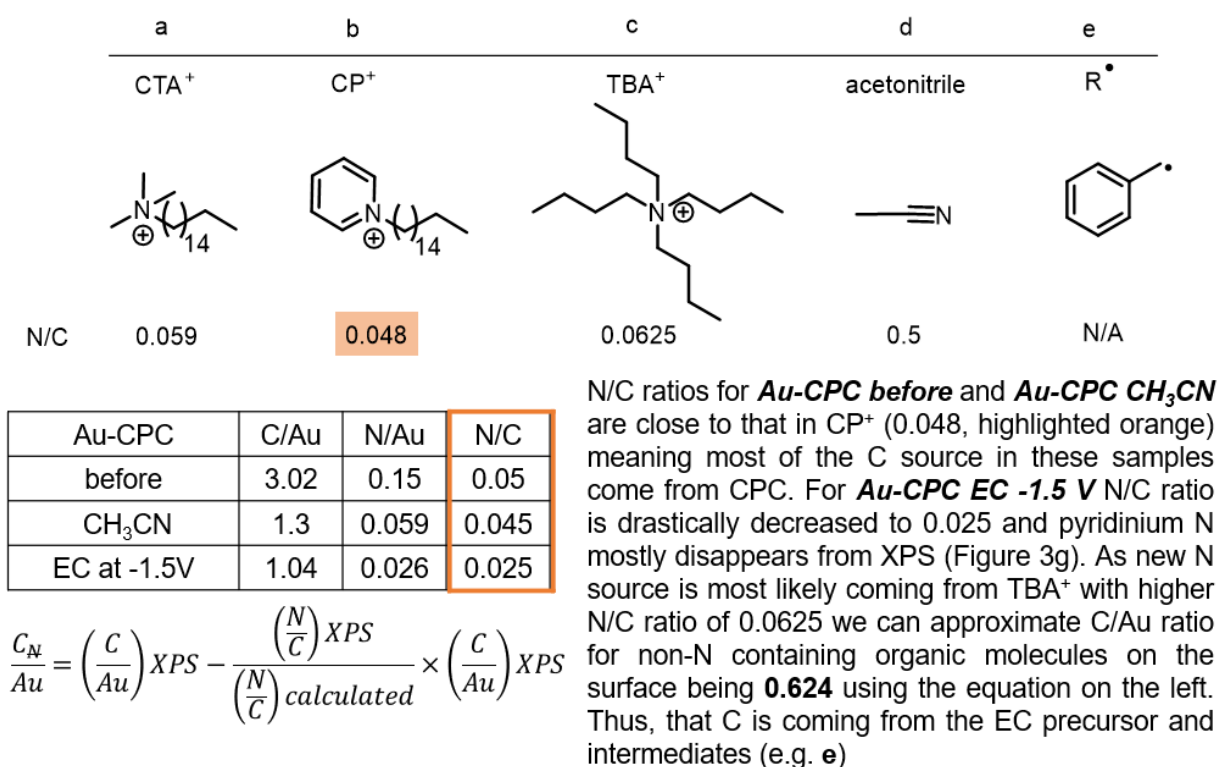

**Fig. S6:** Description of XPS evaluation of adsorbed organic molecules for Au-CPC.

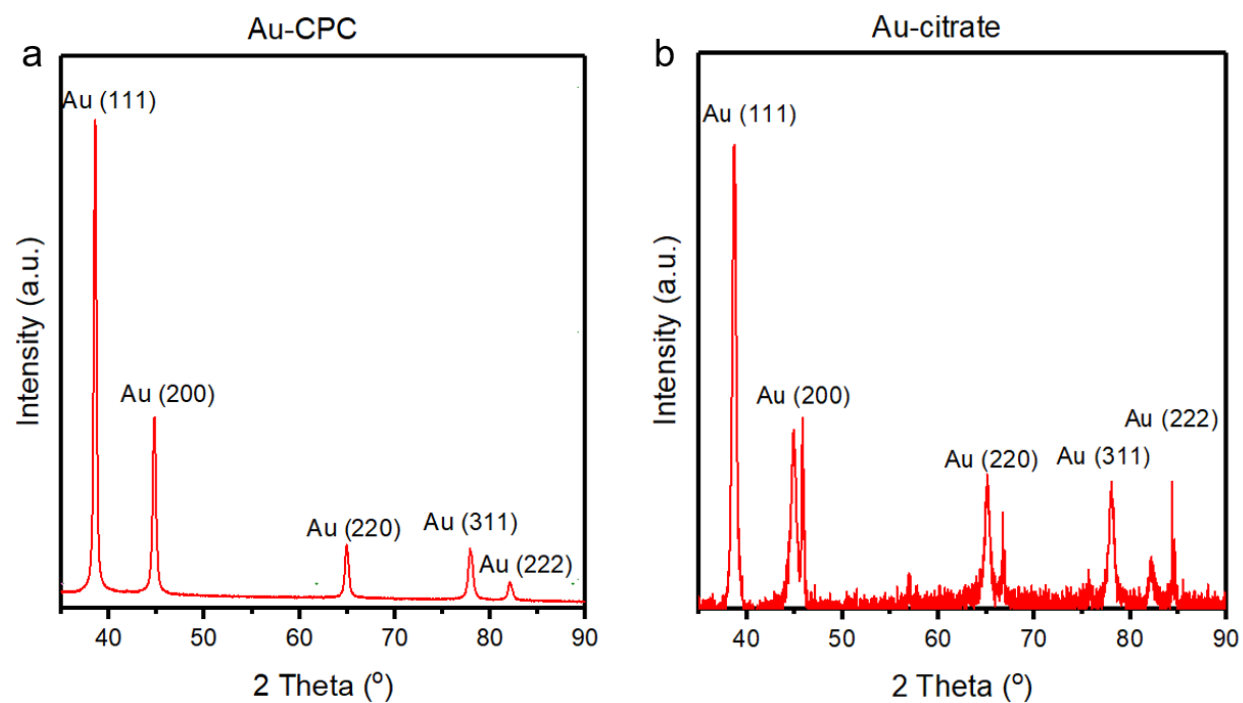

**Fig. S7:** XRD evaluation of Au-CPC (a) and Au-citrate (b) crystallinity. Au-CPC showing narrow representative peaks of single crystalline Au, while Au-citrate showing broadened peaks with bands characteristic of polycrystalline Au materials.
